# Supplementary material
Source: PubMed Central journal article supplement (PMC1941459)
Supplement: pnas_0608144104_2.pdf [file pnas_0608144104_2.pdf]

**Table 3. Full details of the optimal regression tree for climate sensitivity (CS) partially shown in Fig. 2**

```

1) root 43692 1.194089e+05 3.668757
2) entcoef>=1.8 32511 2.979913e+04 3.147061
4) vf1>=0.75 22837 1.203441e+04 2.881546
8) ct< 0.00025 14246 6.367381e+03 2.652459
16) eacf>=1.5 8692 1.796351e+03 2.425833
32) rhcrit< 2.5 6323 7.545742e+02 2.351461
64) ct< 7.5e-05 2954 3.657993e+02 2.222029
128) eacf>=2.5 1279 1.464900e+02 2.100512 *
129) eacf< 2.5 1675 1.860019e+02 2.314817 *
65) ct>=7.5e-05 3369 2.958960e+02 2.464950
130) eacf>=2.5 1472 1.173587e+02 2.340354 *
131) eacf< 2.5 1897 1.379538e+02 2.561631 *
33) rhcrit>=2.5 2369 9.134571e+02 2.624336
66) entcoef>=6 1369 1.897579e+02 2.486988 *
67) entcoef< 6 1000 6.625187e+02 2.812365
134) cw>=2.5 199 1.044908e+02 2.445909 *
135) cw< 2.5 801 5.246649e+02 2.903407 *
17) eacf< 1.5 5554 3.425979e+03 3.007127
34) ct< 7.5e-05 2540 9.137529e+02 2.798878
68) vf1>=1.5 1323 2.073748e+02 2.697517 *
69) vf1< 1.5 1217 6.780087e+02 2.909068 *
35) ct>=7.5e-05 3014 2.309241e+03 3.182626
70) dtice>=-7.5 1959 1.924186e+02 3.034822
140) cw>=2.5 615 4.217185e+01 2.794237 *
141) ct< 2.5 1344 9.836088e+01 3.144912 *
71) dtice< -7.5 1055 1.994560e+03 3.457078
142) entcoef< 6 550 5.437738e+01 3.094440 *
143) entcoef>=6 505 1.789080e+03 3.852031
286) ice>=1.5 91 3.854092e+00 2.881102 *
287) ice< 1.5 414 1.680584e+03 4.065447
574) middleware=cpdnboinc 62 2.358707e+00 2.916019 *
575) middleware=cpdnexpt 352 1.581884e+03 4.267903
1150) rhcrit< 2.5 243 4.426677e+02 3.895338
2300) vf1>=1.5 125 1.063139e+02 3.548403 *
2301) vf1< 1.5 118 3.053702e+02 4.262855
4602) rhcrit< 1.5 59 6.217612e+01 3.683686 *
4603) rhcrit>=1.5 59 2.036126e+02 4.842023 *
1151) rhcrit>=2.5 109 1.030291e+03 5.098484
2302) ram_size>=432 78 5.703520e+02 4.482013
4604) vf1>=1.5 39 1.072108e+02 3.832477
9208) clock_classic>=2050 21 2.598736e+01
3.050507 *
9209) clock_classic< 2050 18 5.340128e+01
4.744775 *
4605) vf1< 1.5 39 4.302332e+02 5.131548
9210) clock_classic>=2675 10 3.362384e+01
3.658707 *
9211) clock_classic< 2675 29 3.674366e+02
5.639424 *
2303) ram_size< 432 31 3.557109e+02 6.649607
4606) vf1>=1.5 13 3.195733e+01 5.042744 *
4607) vf1< 1.5 18 2.659452e+02 7.810120 *
9) ct>=0.00025 8591 3.679610e+03 3.261429
18) eacf>=1.5 5561 9.208504e+02 3.035912
36) cw>=2.5 1772 1.677800e+02 2.723741
72) eacf>=2.5 772 5.128165e+01 2.554517 *
73) eacf< 2.5 1000 7.732364e+01 2.854382 *
37) cw< 2.5 3789 4.996286e+02 3.181905
74) rhcrit< 2.5 2510 1.610094e+02 3.021643

```

```

148) eacf>=2.5 1127 5.040704e+01 2.877287 *
149) eacf< 2.5 1383 6.797880e+01 3.139279 *
75) rhcrit>=2.5 1279 1.476392e+02 3.496414
150) entcoef>=6 609 4.620542e+01 3.290181 *
151) entcoef< 6 670 5.198789e+01 3.683871 *
19) eacf< 1.5 3030 1.956872e+03 3.675324
38) vfl>=1.5 1547 5.423441e+02 3.485550
76) dtice>=-7.5 981 8.111487e+01 3.373304 *
77) dtice< -7.5 566 4.274469e+02 3.680098
154) entcoef< 6 272 1.800268e+01 3.439978 *
155) entcoef>=6 294 3.792522e+02 3.902249
310) middleware=cpdnboinc 51 1.984156e+00 3.185371 *
311) middleware=cpdnexpt 243 3.455576e+02 4.052705
622) ice>=1.5 43 2.090292e+00 3.295091 *
623) ice< 1.5 200 3.134797e+02 4.215592 *
39) vfl< 1.5 1483 1.300695e+03 3.873288
78) dtice>=-7.5 954 1.178820e+02 3.692475
156) rhcrit< 2.5 634 3.877016e+01 3.567494 *
157) rhcrit>=2.5 320 4.958795e+01 3.940093 *
79) dtice< -7.5 529 1.095376e+03 4.199368
158) entcoef< 6 262 2.840485e+01 3.686375 *
159) entcoef>=6 267 9.303660e+02 4.702754
318) ice>=1.5 56 3.361085e+00 3.535629 *
319) ice< 1.5 211 8.304772e+02 5.012512
638) middleware=cpdnboinc 29 1.521491e+00 3.660150 *
639) middleware=cpdnexpt 182 7.674670e+02 5.227999
1278) processor_name= Intel Celeron, Intel Celeron
Mobile, Intel Pentium 4, Intel Pentium 4 mobile, Intel Pentium III,
Intel Pentium M, Intel Xeon, Unknown x86 175 7.013348e+02 5.122705
2556) ice_size>=3.5e-05 8 2.408970e-01 3.353636
*
2557) ice_size< 3.5e-05 167 6.748577e+02
5.207451
5114) rhcrit< 2.5 111 2.546007e+02 4.947404 *
5115) rhcrit>=2.5 56 3.978721e+02 5.722902
10230) ram_size>=320 45 2.798293e+02 5.237008
*
10231) ram_size< 320 11 6.395614e+01 7.710647
*
1279) processor_name= AMD Athlon, AMD K7, Intel
Pentium III Mobile 7 1.568728e+01 7.860344 *
5) vfl< 0.75 9674 1.235417e+04 3.773851
10) ct< 0.00025 5758 4.939883e+03 3.358587
20) eacf>=1.5 3430 2.114316e+03 3.080870
40) entcoef< 6 1500 9.962843e+02 2.760047
80) rhcrit< 2.5 1134 3.736310e+02 2.599028
160) eacf>=2.5 448 7.167607e+01 2.369784 *
161) eacf< 2.5 686 2.630357e+02 2.748739
322) dtice>=-7.5 443 8.179104e+01 2.588731 *
323) dtice< -7.5 243 1.492260e+02 3.040440 *
81) rhcrit>=2.5 366 5.021569e+02 3.258940
162) eacf>=2.5 140 1.661409e+02 2.901187 *
163) eacf< 2.5 226 3.069981e+02 3.480557 *
41) entcoef>=6 1930 8.436473e+02 3.330214
82) rhcrit>=1.5 1245 3.752738e+02 3.200759
164) ct< 7.5e-05 545 1.750945e+02 3.008016 *
165) ct>=7.5e-05 700 1.641689e+02 3.350824 *
83) rhcrit< 1.5 685 4.095877e+02 3.565500
166) ice_size>=3.5e-05 247 3.595493e+01 3.267297 *
167) ice_size< 3.5e-05 438 3.392819e+02 3.733665
334) alphas< 0.535 209 9.249247e+01 3.312159 *
335) alphas>=0.535 229 1.757675e+02 4.118358 *
21) eacf< 1.5 2328 2.171250e+03 3.767766
42) ct< 7.5e-05 1061 3.885062e+02 3.410104

```

```

84) entcoef< 6 541 9.748903e+01 3.150745 *
85) entcoef>=6 520 2.167645e+02 3.679937 *
43) ct>=7.5e-05 1267 1.533361e+03 4.067276
86) cw>=2.5 370 2.926109e+02 3.548375
172) entcoef< 6 190 2.774789e+01 3.108116 *
173) entcoef>=6 180 1.891625e+02 4.013092 *
87) cw< 2.5 897 1.100030e+03 4.281316
174) rhcrit< 2.5 611 2.752042e+02 3.999536
348) entcoef< 6 316 2.826323e+01 3.701394 *
349) entcoef>=6 295 1.887638e+02 4.318901
698) ice_size>=3.5e-05 72 3.735286e+00 3.740416 *
699) ice_size< 3.5e-05 223 1.531546e+02 4.505677 *
175) rhcrit>=2.5 286 6.726704e+02 4.883300
350) dtice>=-7.5 171 4.552959e+01 4.462207 *
351) dtice< -7.5 115 5.517321e+02 5.509448
702) entcoef< 6 61 5.723716e+00 4.581096 *
703) entcoef>=6 54 4.340493e+02 6.558142
1406) ice>=1.5 13 6.640718e-01 4.079115 *
1407) ice< 1.5 41 3.281609e+02 7.344175
2814) ram_size>=499.623 24 1.813117e+02 6.490472
*
2815) ram_size< 499.623 17 1.046639e+02 8.549404
*

11) ct>=0.00025 3916 4.961359e+03 4.384446
22) eacf>=1.5 2497 2.079978e+03 4.020866
44) rhcrit< 2.5 1740 1.215206e+03 3.790798
88) entcoef< 6 880 3.588862e+02 3.368821
176) eacf>=2.5 395 6.208636e+01 3.037634
352) cw>=2.5 117 7.471322e+00 2.613851 *
353) cw< 2.5 278 2.475943e+01 3.215989 *
177) eacf< 2.5 485 2.181888e+02 3.638550
354) cw>=2.5 150 7.800831e+01 3.223664 *
355) cw< 2.5 335 1.027999e+02 3.824320 *
89) entcoef>=6 860 5.392830e+02 4.222588
178) ice_size>=3.5e-05 262 3.846429e+01 3.788617 *
179) ice_size< 3.5e-05 598 4.298579e+02 4.412722
358) middleware=cpdnexpt 374 2.278951e+02 4.113722 *
359) middleware=cpdnboinc 224 1.127006e+02 4.911945 *
45) rhcrit>=2.5 757 5.609732e+02 4.549688
90) cw>=2.5 218 7.423815e+01 3.699108 *
91) cw< 2.5 539 2.652247e+02 4.893707
182) ice_size>=3.5e-05 170 3.068864e+01 4.400633 *
183) ice_size< 3.5e-05 369 1.741639e+02 5.120869
366) eacf>=2.5 155 7.292699e+01 4.783256 *
367) eacf< 2.5 214 7.077309e+01 5.365402 *
23) eacf< 1.5 1419 1.970462e+03 5.024235
46) rhcrit< 2.5 957 8.167399e+02 4.702907
92) entcoef< 6 467 8.139724e+01 4.212028 *
93) entcoef>=6 490 5.155656e+02 5.170745
186) ice>=1.5 144 8.765764e+00 4.455893 *
187) ice< 1.5 346 4.025884e+02 5.468256
374) ice_size>=3.5e-05 88 8.514419e+00 4.440846 *
375) ice_size< 3.5e-05 258 2.695002e+02 5.818691
750) dtice>=4 30 4.733449e+00 4.829990 *
751) dtice< 4 228 2.315822e+02 5.948783 *
47) rhcrit>=2.5 462 8.502278e+02 5.689844
94) cw>=2.5 148 2.120657e+02 4.869281
188) dtice>=-7.5 101 3.014385e+01 4.604992 *
189) dtice< -7.5 47 1.597071e+02 5.437219
378) entcoef< 6 27 1.080194e+00 4.619334 *
379) entcoef>=6 20 1.161829e+02 6.541365
758) processor_name= AMD 64, Intel Pentium 4 12
3.771789e+01 5.342579 *

```

```

759) processor_name= AMD K7, Intel Celeron, Unknown
x86 8 3.535242e+01 8.339543 *
95) cw< 2.5 314 4.915405e+02 6.076606
190) ice_size>=3.5e-05 89 1.875394e+01 5.251308 *
191) ice_size< 3.5e-05 225 3.881889e+02 6.403057
382) ice>=1.5 58 5.077771e+00 5.627606 *
383) ice< 1.5 167 3.361214e+02 6.672375
766) entcoef< 6 103 8.415889e+01 6.172127 *
767) entcoef>=6 64 1.847043e+02 7.477463 *
3) entcoef< 1.8 11181 5.503283e+04 5.185694
6) rhcrit< 2.5 7907 1.744855e+04 4.503227
12) eacf>=1.5 4604 6.814259e+03 3.987462
24) ct< 0.00025 2259 2.912666e+03 3.349098
48) vf1>=0.75 1665 1.191428e+03 3.132785
96) ct< 7.5e-05 564 6.047559e+02 2.821196
192) processor_name= -1, AMD 64, AMD Athlon, AMD Athlon
MP, AMD Athlon XP, AMD K7, AMD Sempron, Intel Celeron, Intel Celeron
Mobile, Intel Pentium 4, Intel Pentium 4 mobile, Intel Pentium III,
Intel Pentium M, Intel Xeon, Opteron, Unknown Intel, Unknown x86 556
5.155030e+02 2.790312 *
193) processor_name= AMD Duron, Intel Pentium, Intel
Pentium III Mobile 8 5.186683e+01 4.967583 *
97) ct>=7.5e-05 1101 5.038647e+02 3.292400
194) eacf>=2.5 491 1.917987e+02 3.004729 *
195) eacf< 2.5 610 2.387278e+02 3.523952 *
49) vf1< 0.75 594 1.424954e+03 3.955429
98) rhcrit< 1.5 359 3.299994e+02 3.568636 *
99) rhcrit>=1.5 235 9.591945e+02 4.546317
198) eacf>=2.5 81 2.525886e+02 3.823112
396) ct< 7.5e-05 13 1.365625e+01 2.287662 *
397) ct>=7.5e-05 68 2.024242e+02 4.116653 *
199) eacf< 2.5 154 6.419578e+02 4.926704
398) cw< 2.5 143 3.178523e+02 4.716692 *
399) cw>=2.5 11 2.358073e+02 7.656861 *
25) ct>=0.00025 2345 2.094229e+03 4.602415
50) rhcrit< 1.5 1177 4.062958e+02 4.029308
100) cw>=2.5 357 8.692844e+01 3.553015 *
101) cw< 2.5 820 2.031213e+02 4.236669
202) eacf>=2.5 372 4.832714e+01 3.891362 *
203) eacf< 2.5 448 7.360676e+01 4.523397
406) vf1>=1.5 147 8.567475e+00 4.142523 *
407) vf1< 1.5 301 3.330036e+01 4.709405 *
51) rhcrit>=1.5 1168 9.117788e+02 5.179938
102) vf1>=1.5 410 1.199927e+02 4.550289
204) cw>=2.5 117 2.974631e+01 4.061487 *
205) cw< 2.5 293 5.112911e+01 4.745477 *
103) vf1< 1.5 758 5.413172e+02 5.520513
206) cw>=2.5 186 1.006915e+02 4.774482
412) eacf>=2.5 85 3.468075e+01 4.291515 *
413) eacf< 2.5 101 2.949789e+01 5.180940 *
207) cw< 2.5 572 3.034428e+02 5.763103
414) eacf>=2.5 307 1.203370e+02 5.419276 *
415) eacf< 2.5 265 1.047683e+02 6.161424 *
13) eacf< 1.5 3303 7.702435e+03 5.222143
26) ct< 7.5e-05 816 1.364197e+03 4.170059
52) vf1>=0.75 548 7.186404e+02 3.783397
104) dtice< -7.5 223 3.370976e+02 3.242683
208) ice< 1.5 189 2.309793e+02 3.036455 *
209) ice>=1.5 34 5.339723e+01 4.389069 *
105) dtice>=-7.5 325 2.716076e+02 4.154410
210) vf1>=1.5 185 1.129157e+02 3.883083 *
211) vf1< 1.5 140 1.270756e+02 4.512948 *
53) vf1< 0.75 268 3.960978e+02 4.960696
106) cw>=2.5 47 8.444045e+01 3.753323 *

```

```

107) cw< 2.5 221 2.285722e+02 5.217467 *
27) ct>=7.5e-05 2487 5.138671e+03 5.567339
54) vf1>=1.5 858 9.035465e+02 4.774182
108) dtice< -7.5 325 5.346933e+02 4.215155
216) ice< 1.5 265 4.332619e+02 3.981383
432) middleware=cpdnexpt 231 3.813272e+02 3.832113
864) clock_classic< 1475 40 2.992517e+01 3.017383 *
865) clock_classic>=1475 191 3.192901e+02 4.002737
*
433) middleware=cpdnboinc 34 1.181832e+01 4.995537 *
217) ice>=1.5 60 2.298631e+01 5.247652 *
109) dtice>=-7.5 533 2.053570e+02 5.115051
218) rhcrit< 1.5 266 4.860670e+01 4.749816 *
219) rhcrit>=1.5 267 8.591599e+01 5.478919
438) ct< 0.00025 120 2.241864e+01 5.065442 *
439) ct>=0.00025 147 2.623441e+01 5.816451 *
55) vf1< 1.5 1629 3.411062e+03 5.985097
110) rhcrit< 1.5 814 7.354568e+02 5.405519
220) alphas< 0.535 343 4.209517e+02 4.991040
440) vf1>=0.75 186 2.715495e+02 4.730908 *
441) vf1< 0.75 157 1.219047e+02 5.299220 *
221) alphas>=0.535 471 2.126687e+02 5.707358
442) vf1>=0.75 234 6.750654e+01 5.440700 *
443) vf1< 0.75 237 1.120948e+02 5.970641
886) ice>=1.5 57 1.009419e+01 5.247893 *
887) ice< 1.5 180 6.279707e+01 6.199512 *
111) rhcrit>=1.5 815 2.129077e+03 6.563965
222) dtice< -7.5 303 1.145794e+03 5.613543
444) middleware=cpdnexpt 242 9.484830e+02 5.265592
888) vf1>=0.75 130 4.690878e+02 4.770829
1776) clock_classic< 2900 118 4.217175e+02
4.607803
3552) ice< 1.5 103 3.883157e+02 4.414024 *
3553) ice>=1.5 15 2.976171e+00 5.938417 *
1777) clock_classic>=2900 12 1.339533e+01 6.373920
*
889) vf1< 0.75 112 4.106353e+02 5.839870
1778) clock_classic< 2625 96 3.335645e+02 5.620280
3556) ice_size< 3.5e-05 86 2.890096e+02 5.437201
7112) ct< 0.00025 36 1.035241e+02 4.718419 *
7113) ct>=0.00025 50 1.534947e+02 5.954724 *
3557) ice_size>=3.5e-05 10 1.688268e+01 7.194755
*
1779) clock_classic>=2625 16 4.466689e+01 7.157415
*
445) middleware=cpdnboinc 61 5.177699e+01 6.993937 *
223) dtice>=-7.5 512 5.476074e+02 7.126422
446) vf1>=0.75 269 1.690747e+02 6.688870
892) ct< 0.00025 110 4.867730e+01 6.151760 *
893) ct>=0.00025 159 6.670963e+01 7.060456 *
447) vf1< 0.75 243 2.700217e+02 7.610789
894) ice>=1.5 61 2.555628e+01 6.592012 *
895) ice< 1.5 182 1.599330e+02 7.952247 *
7) rhcrit>=2.5 3274 2.500729e+04 6.833912
14) ct< 7.5e-05 498 2.692829e+03 3.277840
28) eacf>=1.5 303 1.925059e+02 2.398992
56) cw>=2.5 56 2.552495e+00 1.629563 *
57) cw< 2.5 247 1.492836e+02 2.573438 *
29) eacf< 1.5 195 1.902649e+03 4.643434
58) cw>=2.5 73 4.575670e+01 2.589906 *
59) cw< 2.5 122 1.364854e+03 5.872185
118) dtice< -7.5 61 2.706687e+02 3.836929
236) middleware=cpdnexpt 53 1.337162e+02 3.408089
472) vf1>=0.75 38 5.803667e+01 2.895970 *

```

```

473) vf1< 0.75 15 4.046605e+01 4.705455 *
237) middleware=cpdnboinc 8 6.263217e+01 6.677998 *
119) dtice>=-7.5 61 5.888291e+02 7.907440
238) vf1>=1.5 23 5.317136e+01 5.631845 *
239) vf1< 1.5 38 3.444682e+02 9.284774
478) dtice>=-3.5 20 1.822994e+02 8.316263
956) ram_size>=511.74 11 2.856885e+01 7.148643 *
957) ram_size< 511.74 9 1.204046e+02 9.743354 *
479) dtice< -3.5 18 1.225637e+02 10.360900 *
15) ct>=7.5e-05 2776 1.488719e+04 7.471852
30) vf1>=1.5 1001 2.519227e+03 6.012952
60) ct< 0.00025 373 1.359248e+03 5.111318
120) cw>=2.5 79 2.227835e+02 3.104577
240) eacf>=1.5 57 3.261649e+01 2.650872 *
241) eacf< 1.5 22 1.480336e+02 4.280086
482) dtice< -7.5 15 5.764194e+01 3.133297 *
483) dtice>=-7.5 7 2.839292e+01 6.737491 *
121) cw< 2.5 294 7.328462e+02 5.650544
242) eacf>=2.5 71 1.086933e+02 4.325282 *
243) eacf< 2.5 223 4.597518e+02 6.072489
486) ice< 1.5 183 2.642645e+02 5.743458
972) eacf>=1.5 69 6.263136e+01 5.309769 *
973) eacf< 1.5 114 1.808001e+02 6.005954
1946) dtice< -7.5 39 1.174132e+02 5.193034 *
1947) dtice>=-7.5 75 2.421242e+01 6.428672 *
487) ice>=1.5 40 8.503618e+01 7.577807 *
61) ct>=0.00025 628 6.766488e+02 6.548477
122) ice< 1.5 485 5.588750e+02 6.358002
244) dtice< -7.5 144 3.197071e+02 5.744510
488) clock_classic< 1375 18 4.134883e+01 4.262056 *
489) clock_classic>=1375 126 2.331491e+02 5.956289 *
245) dtice>=-7.5 341 1.620832e+02 6.617072
490) ice_size>=3.5e-05 120 2.713767e+01 6.018676 *
491) ice_size< 3.5e-05 221 6.864442e+01 6.941993 *
123) ice>=1.5 143 4.049850e+01 7.194493 *
31) vf1< 1.5 1775 9.035948e+03 8.294590
62) vf1>=0.75 944 3.996511e+03 7.695711
124) ct< 0.00025 348 2.196764e+03 6.909608
248) cw>=2.5 44 5.750961e+02 4.702243
496) eacf>=1.5 22 1.108666e+01 2.785823 *
497) eacf< 1.5 22 4.024121e+02 6.618663
994) dtice< -7.5 10 5.297122e+01 4.053586 *
995) dtice>=-7.5 12 2.288145e+02 8.756227 *
249) cw< 2.5 304 1.376250e+03 7.229095
498) eacf>=2.5 59 1.703277e+02 5.698557 *
499) eacf< 2.5 245 1.034429e+03 7.597673
998) middleware=cpdnexpt 159 7.820282e+02 7.143387
1996) ram_size< 704 108 6.197735e+02 6.757964
3992) dtice< -7.5 57 5.042745e+02 6.203817
7984) eacf< 1.5 40 3.523335e+02 5.403309
15968) clock_classic< 2550 32 2.786997e+02
4.901734
31936) processor_name= AMD Athlon, Intel
Pentium 4, Intel Pentium 4 mobile 14 2.294475e+01 3.168850 *
31937) processor_name= Intel Celeron, Intel
Pentium M, Unknown x86 18 1.810164e+02 6.249532 *
15969) clock_classic>=2550 8 3.338142e+01
7.409611 *
7985) eacf>=1.5 17 6.599677e+01 8.087363 *
3993) dtice>=-7.5 51 7.843268e+01 7.377305 *
1997) ram_size>=704 51 1.122366e+02 7.959578 *
999) middleware=cpdnboinc 86 1.589198e+02 8.437574 *
125) ct>=0.00025 596 1.459131e+03 8.154711
250) ice>=1.5 134 5.108655e+01 7.223880 *

```

251) ice< 1.5 462 1.258265e+03 8.424693  
 502) middleware=cpdnexpt 237 9.935461e+02 7.964648  
 1004) clock\_classic< 2125 135 7.088966e+02 7.451710  
 2008) dtice< -7.5 90 5.911500e+02 6.868140  
 4016) eacf< 1.5 40 3.445783e+02 5.556350  
 8032) processor\_name= Intel Pentium 4, Intel  
 Pentium 4 mobile, Intel Pentium III Mobile 16 9.275412e+01 4.474267 \*  
 8033) processor\_name= AMD Athlon, Intel  
 Celeron, Unknown x86 24 2.206001e+02 6.277739 \*  
 4017) eacf>=1.5 50 1.226748e+02 7.917571  
 8034) eacf>=2.5 15 2.018262e+01 6.166692 \*  
 8035) eacf< 2.5 35 3.680117e+01 8.667948 \*  
 2009) dtice>=-7.5 45 2.579679e+01 8.618852 \*  
 1005) clock\_classic>=2125 102 2.021197e+02 8.643536  
 \*  
 503) middleware=cpdnboinc 225 1.617262e+02 8.909273  
 1006) ice\_size>=3.5e-05 87 3.711419e+01 8.362322 \*  
 1007) ice\_size< 3.5e-05 138 8.217735e+01 9.254091 \*  
 63) vfl< 0.75 831 4.316257e+03 8.974904  
 126) ice>=1.5 169 3.248433e+02 7.434841  
 252) ct< 0.00025 56 1.873077e+02 6.751714 \*  
 253) ct>=0.00025 113 9.845160e+01 7.773381 \*  
 127) ice< 1.5 662 3.488253e+03 9.368062  
 254) alphas< 0.535 239 1.496695e+03 8.367956  
 508) cw>=2.5 47 4.529823e+02 6.943487  
 1016) ct< 0.00025 11 2.059329e+01 2.824593 \*  
 1017) ct>=0.00025 36 1.887486e+02 8.202038 \*  
 509) cw< 2.5 192 9.249992e+02 8.716654  
 1018) processor\_name= AMD Athlon, Intel Pentium 4  
 mobile 10 4.353576e+01 5.795479 \*  
 1019) processor\_name= AMD 64, AMD Athlon XP, AMD  
 Duron, AMD K7, Intel Celeron, Intel Pentium 4, Intel Pentium III, Intel  
 Pentium M, Intel Xeon, Unknown x86 182 7.914422e+02 8.877158  
 2038) os\_name= Windows 98, Windows ME, Windows NT4  
 10 8.806768e+01 6.980694 \*  
 2039) os\_name= Linux, Windows 2000, Windows 2003,  
 Windows XP 172 6.653177e+02 8.987418  
 4078) ice\_size< 3.5e-05 163 6.195686e+02  
 8.890759  
 8156) middleware=cpdnexpt 142 5.571653e+02  
 8.724148  
 16312) ram\_size< 384 30 1.341752e+02 7.869407  
 \*  
 16313) ram\_size>=384 112 3.952018e+02  
 8.953097 \*  
 8157) middleware=cpdnboinc 21 3.180749e+01  
 10.017360 \*  
 4079) ice\_size>=3.5e-05 9 1.664481e+01 10.738020  
 \*  
 255) alphas>=0.535 423 1.617440e+03 9.933134  
 510) eacf>=1.5 247 1.123959e+03 9.443471  
 1020) ct< 0.00025 61 6.702771e+02 8.179245  
 2040) processor\_name= -1, AMD Athlon XP, AMD Duron,  
 Intel Xeon, Unknown Intel, Unknown x86 16 1.575254e+02 6.154435 \*  
 2041) processor\_name= AMD 64, AMD Athlon, AMD  
 Athlon MP, Intel Celeron, Intel Pentium 4, Intel Pentium M 45  
 4.238304e+02 8.899178  
 4082) clock\_boinc\_i< 2.606251e+09 30 2.306166e+02  
 8.194619  
 8164) ice\_size< 3.5e-05 18 1.326846e+02  
 7.282475 \*  
 8165) ice\_size>=3.5e-05 12 6.049174e+01  
 9.562835 \*

```

10.308290 *
    4083) clock_boinc_i>=2.606251e+09 15 1.485375e+02
    1021) ct>=0.00025 186 3.242136e+02 9.858082
    2042) cw>=2.5 37 1.108600e+02 8.930413 *
    2043) cw< 2.5 149 1.736057e+02 10.088440 *
    511) eacf< 1.5 176 3.511438e+02 10.620330
    1022) midware=cpdnexpt 61 1.460212e+02 9.946169 *
    1023) midware=cpdnboinc 115 1.626925e+02 10.977930
    2046) dtice< -3.5 60 6.210235e+01 10.473100 *
    2047) dtice>=-3.5 55 6.861761e+01 11.528660 *

```

Each node is given on a separate numbered line, the indentation indicating the depth in the tree starting at the root. After the node number in order is (i) the statement evaluated at the node, (ii) the number of model runs arriving at that node, (iii) their deviance, and (iv) their mean climate sensitivity. An asterisk indicates a terminal node.
