# Supplementary material
Source: PubMed Central journal article supplement (PMC1941459)
Supplement: pnas_0608144104_3.pdf [file pnas_0608144104_3.pdf]

**Table 4. Full details of the optimal regression tree for model failure shown in SI Fig. 8**

```

1) root 56780 13088 1 (0.23050370 0.76949630)
2) ct< 0.00025 37773 12147 1 (0.32157891 0.67842109)
4) entcoef< 1.8 12070 5622 0 (0.53421707 0.46578293)
8) cw>=2.5 3950 1046 0 (0.73518987 0.26481013)
16) eacf>=1.5 2575 540 0 (0.79029126 0.20970874) *
17) eacf< 1.5 1375 506 0 (0.63200000 0.36800000)
34) rhcrit>=1.5 925 284 0 (0.69297297 0.30702703) *
35) rhcrit< 1.5 450 222 0 (0.50666667 0.49333333)
70) dtice>=-7.5 267 108 0 (0.59550562 0.40449438) *
71) dtice< -7.5 183 69 1 (0.37704918 0.62295082) *
9) cw< 2.5 8120 3544 1 (0.43645320 0.56354680)
18) ct< 7.5e-05 4070 1611 0 (0.60417690 0.39582310)
36) eacf>=1.5 2699 834 0 (0.69099667 0.30900333)
72) rhcrit>=1.5 1806 441 0 (0.75581395 0.24418605) *
73) rhcrit< 1.5 893 393 0 (0.55991041 0.44008959)
146) eacf>=2.5 405 142 0 (0.64938272 0.35061728) *
147) eacf< 2.5 488 237 1 (0.48565574 0.51434426)
294) vf1< 0.75 170 67 0 (0.60588235 0.39411765) *
295) vf1>=0.75 318 134 1 (0.42138365 0.57861635) *
37) eacf< 1.5 1371 594 1 (0.43326039 0.56673961)
74) rhcrit>=2.5 463 122 0 (0.73650108 0.26349892) *
75) rhcrit< 2.5 908 253 1 (0.27863436 0.72136564) *
19) ct>=7.5e-05 4050 1085 1 (0.26790123 0.73209877)
38) eacf>=1.5 2682 978 1 (0.36465324 0.63534676)
76) rhcrit>=2.5 878 423 0 (0.51822323 0.48177677)
152) eacf>=2.5 407 154 0 (0.62162162 0.37837838) *
153) eacf< 2.5 471 202 1 (0.42887473 0.57112527) *
77) rhcrit< 2.5 1804 523 1 (0.28991131 0.71008869) *
39) eacf< 1.5 1368 107 1 (0.07821637 0.92178363) *
5) entcoef>=1.8 25703 5699 1 (0.22172509 0.77827491)
10) ct< 7.5e-05 12775 3872 1 (0.30309198 0.69690802)
20) rhcrit>=2.5 4238 2010 1 (0.47428032 0.52571968)
40) eacf>=1.5 2774 1201 0 (0.56705119 0.43294881)
80) entcoef< 6 1417 457 0 (0.67748765 0.32251235) *
81) entcoef>=6 1357 613 1 (0.45173176 0.54826824) *
162) vf1< 0.75 430 184 0 (0.57209302 0.42790698) *
163) vf1>=0.75 927 367 1 (0.39590076 0.60409924) *
41) eacf< 1.5 1464 437 1 (0.29849727 0.70150273)
82) cw>=2.5 501 221 0 (0.55888224 0.44111776)
164) entcoef< 6 279 80 0 (0.71326165 0.28673835) *
165) entcoef>=6 222 81 1 (0.36486486 0.63513514) *
83) cw< 2.5 963 157 1 (0.16303219 0.83696781) *
21) rhcrit< 2.5 8537 1862 1 (0.21810941 0.78189059)
42) entcoef< 6 4402 1459 1 (0.33144025 0.66855975)
84) eacf>=1.5 2869 1234 1 (0.43011502 0.56988498)
168) eacf>=2.5 1313 621 0 (0.52703732 0.47296268)
336) vf1< 1.5 890 377 0 (0.57640449 0.42359551)
672) rhcrit>=1.5 470 162 0 (0.65531915 0.34468085) *
673) rhcrit< 1.5 420 205 1 (0.48809524 0.51190476)
1346) ram_size>=2046.41 24 4 0 (0.83333333 0.16666667)
*
1347) ram_size< 2046.41 396 185 1 (0.46717172
0.53282828) *
337) vf1>=1.5 423 179 1 (0.42316785 0.57683215)
674) cw>=2.5 143 63 0 (0.55944056 0.44055944)
1348) processor_name= AMD Athlon MP, Intel Pentium 4,
Intel Pentium III Mobile, Intel Xeon, Unknown x86 116 43 0 (0.62931034
0.37068966) *
1349) processor_name= -1, AMD Athlon XP, Intel Celeron,
Intel Pentium 4 mobile, Intel Pentium M, Opteron, Unknown AMD 27 7 1
(0.25925926 0.74074074) *
675) cw< 2.5 280 99 1 (0.35357143 0.64642857) *

```

```

    169) eacf< 2.5 1556    542 1 (0.34832905 0.65167095) *
    85) eacf< 1.5 1533    225 1 (0.14677104 0.85322896) *
    43) entcoef>=6 4135    403 1 (0.09746070 0.90253930) *
11) ct>=7.5e-05 12928 1827 1 (0.14132116 0.85867884)
    22) cw>=2.5 4205    1090 1 (0.25921522 0.74078478)
    44) entcoef< 6 2159    783 1 (0.36266790 0.63733210)
    88) eacf>=1.5 1362    655 1 (0.48091043 0.51908957)
    176) rhcrit>=2.5 427    161 0 (0.62295082 0.37704918) *
    177) rhcrit< 2.5 935    389 1 (0.41604278 0.58395722)
    354) eacf>=2.5 427    208 1 (0.48711944 0.51288056)
    708) ice< 1.5 323    148 0 (0.54179567 0.45820433)
    1416) vf1< 0.75 111    37 0 (0.66666667 0.33333333) *
    1417) vf1>=0.75 212    101 1 (0.47641509 0.52358491)
    2834) processor_name= AMD Athlon XP, Intel Celeron
Mobile, Unknown AMD, Unknown x86 54    20 0 (0.62962963 0.37037037) *
    2835) processor_name= -1, AMD 64, AMD Athlon, AMD Athlon
MP, AMD Duron, AMD Mobile Athlon XP, Intel Celeron, Intel Pentium, Intel
Pentium 4, Intel Pentium M, Intel Xeon, Opteron 158    67 1 (0.42405063
0.57594937) *
    709) ice>=1.5 104    33 1 (0.31730769 0.68269231) *
    355) eacf< 2.5 508    181 1 (0.35629921 0.64370079) *
    89) eacf< 1.5 797    128 1 (0.16060226 0.83939774) *
    45) entcoef>=6 2046    307 1 (0.15004888 0.84995112) *
    23) cw< 2.5 8723    737 1 (0.08448928 0.91551072) *
3) ct>=0.00025 19007    941 1 (0.04950808 0.95049192)
6) cw>=2.5 6264    733 1 (0.11701788 0.88298212)
    12) entcoef< 1.8 2007    469 1 (0.23368211 0.76631789)
    24) eacf>=1.5 1288    414 1 (0.32142857 0.67857143)
    48) rhcrit>=2.5 393    179 1 (0.45547074 0.54452926)
    96) eacf>=2.5 200    69 0 (0.65500000 0.34500000) *
    97) eacf< 2.5 193    48 1 (0.24870466 0.75129534) *
    49) rhcrit< 2.5 895    235 1 (0.26256983 0.73743017) *
    25) eacf< 1.5 719    55 1 (0.07649513 0.92350487) *
    13) entcoef>=1.8 4257    264 1 (0.06201550 0.93798450) *
7) cw< 2.5 12743    208 1 (0.01632269 0.98367731) *

```

Each node is given on a separate numbered line, the indentation indicating the depth in the tree, starting at the root. After the node number in order is (i) the statement evaluated at the node, (ii) the number of model runs arriving at that node, (iii) their deviance, (iv) a 0 or 1 to indicate failure or success respectively in fitting an adequate climate sensitivity, and (v) (in brackets) the class probabilities for failure and success respectively. An asterisk indicates a terminal node.
