# Supplementary material
Source: PubMed Central journal article supplement (PMC1941459)
Supplement: pnas_0608144104_5.pdf [file pnas_0608144104_5.pdf]

**Table 6. Full details of the optimal regression tree for variation among runs using the same parameter values (but different initial conditions) shown in SI Fig. 10**

```

1) root 8196 780484.5000 8.911454
2) ct>=0.00025 3262 93735.2800 5.901450
4) vf1>=0.75 2189 56299.2500 5.120034
8) entcoef>=1.8 1505 25890.0200 4.431214 *
9) entcoef< 1.8 684 28123.9600 6.635641
18) dtice>=-7.5 496 7992.1110 5.720620 *
19) dtice< -7.5 188 18620.9200 9.049738
38) clock_classic_CV< 27.22691 118 3865.5580 6.150588 *
39) clock_classic_CV>=27.22691 70 12091.6800 13.936880
78) eacf>=1.5 42 1000.8930 8.084420 *
79) eacf< 1.5 28 7494.4040 22.715560
158) ice>=1.5 11 234.9899 5.004317 *
159) ice< 1.5 17 1576.1230 34.175780 *
5) vf1< 0.75 1073 33372.5800 7.495598 *
3) ct< 0.00025 4934 637656.1000 10.901450
6) entcoef>=1.8 3800 342218.2000 9.101424
12) entcoef>=6 2077 122725.7000 7.296952
24) rhcrit< 2.5 1464 45339.8600 6.145217
48) vf1>=0.75 1000 17989.1600 4.757745 *
49) vf1< 0.75 464 21276.7500 9.135457 *
25) rhcrit>=2.5 613 70805.8600 10.047590
50) cw< 2.5 425 34745.4100 8.508978 *
51) cw>=2.5 188 32779.8900 13.525830 *
13) entcoef< 6 1723 204577.2000 11.276640
26) cw< 2.5 1242 100669.0000 9.112282
52) ct>=7.5e-05 690 13792.7400 6.419184 *
53) ct< 7.5e-05 552 75616.3300 12.478650
106) eacf< 1.5 247 3396.3130 6.743328 *
107) eacf>=1.5 305 57515.4500 17.123330
214) rhcrit< 2.5 229 12749.1200 13.110410 *
215) rhcrit>=2.5 76 29967.0300 29.214870
430) eacf< 2.5 48 10297.6500 24.626730 *
431) eacf>=2.5 28 16926.7300 37.080250
862) RAM_CV>=58.31333 13 1642.4720 21.701000 *
863) RAM_CV< 58.31333 15 9544.6790 50.408930 *
27) cw>=2.5 481 83067.1600 16.865260
54) eacf< 1.5 202 20856.7600 12.136810
108) ct>=7.5e-05 112 3417.0480 8.120391 *
109) ct< 7.5e-05 90 13384.5700 17.135030
218) rhcrit< 1.5 32 544.4641 8.716201 *
219) rhcrit>=1.5 58 9320.7170 21.779900 *
55) eacf>=1.5 279 54424.1400 20.288720 *
7) entcoef< 1.8 1134 241867.3000 16.933280
14) cw< 2.5 914 161009.6000 15.361610
28) ct>=7.5e-05 569 64553.6600 12.486410
56) eacf< 1.5 219 20472.7000 9.559536
112) dtice>=-7.5 164 3502.5240 7.124944 *
113) dtice< -7.5 55 13099.5900 16.819050
226) ice>=1.5 30 541.3672 7.404196 *
227) ice< 1.5 25 6708.0190 28.116870 *
57) eacf>=1.5 350 41030.9900 14.317790 *
29) ct< 7.5e-05 345 83994.2600 20.103610
58) eacf< 1.5 154 27754.5100 17.061420
116) rhcrit< 2.5 130 11374.2500 14.474760 *
117) rhcrit>=2.5 24 10798.9900 31.072520 *
59) eacf>=1.5 191 53665.3400 22.556470 *
15) cw>=2.5 220 69220.1900 23.462850 *

```

Each node is given on a separate numbered line, the indentation indicating the depth in the tree, starting at the root. After the node number in order is (i) the statement evaluated at the node, (ii) the number of model runs arriving at that node, (iii) their deviance, and (iv) their mean value (CV% of climate sensitivities among model runs with the same parameters but varying initial conditions). An asterisk indicates a terminal node.
